# Supplementary material for: Monophyletic origin of domestic bactrian camel (Camelus bactrianus) and its evolutionary relationship with the extant wild camel (Camelus bactrianus ferus)
Source: PubMed Central journal article supplement (PMC2721964; doi:10.1111/j.1365-2052.2008.01848.x), 2009-08
Supplement: age0040-0377-SD1.pdf [file age0040-0377-SD1.pdf]

```

                                     111111111
      11111112223333344555777888889990000011
      14456145899456123492625700121267946602245522
      710017336919127879533333069439326120500650950
n1  ACGTAGAGACTCTTAGCCCCATCTAGCTTCCCTGTTTAAGAGCATA
n2  .....A.....
n3  .....C..C.....T.....C.
D1  .TACG.GC..C..CGATATTG..CGAT..T.CACC...AGATG..
D2  CTACG.GC..C..CGATATT..CGAT..T.CACC...AGATG..
D3  .TACG.GC..C..CGATATTG..CGAT..T..ACC.GAGATG..
D4  CTACG.GC..C..CGATATTG..CGATC.T.CACC...AGATG.G
D5  CTACG.GC..C..CGATATTGCTCGAT..T..ACC...AGATG..
D6  .TACG.GC..C.CCGATATTG..CGAT.CT.CACC...AGATG..
D7  .TACG.GC..C..CGATATTGCTCGAT..T..ACC...AGATG..
D8  .TACG.GC..C..CGATATTG..CGATC.T.CACC...AGATG.G
D9  .TACG.GCCTT.T.CGATATTG..CGAT..TTCACC...AGATG..
D10 .TACG.GC..C..CGATATTG..CGAT..TTCACC...AGATG..
D11 .TACG.GC.T..CGATATTG..CGAT..TTCACC...AGATG..

```

Figure S1. The haplotypes of *cytb* genes among 21 camels. W1, W2, and W3 indicate three haplotypes identified in three wild individuals; D1 to D11 indicate 11 haplotypes found in 18 domestic camel individuals. The numbers on top indicate the position of single nucleotide variations. The points in the figure indicate the same base as the reference (W1).
