# Supplementary material for: Monophyletic origin of domestic bactrian camel (Camelus bactrianus) and its evolutionary relationship with the extant wild camel (Camelus bactrianus ferus)
Source: PubMed Central journal article supplement (PMC2721964; doi:10.1111/j.1365-2052.2008.01848.x), 2009-08
Supplement: age0040-0377-SD3.pdf [file age0040-0377-SD3.pdf]

**Table S1.** Bactrian camel mitochondrial genome sequences used for reconstructing the phylogenic tree

| Species                            | No.of samples | Origin                         | Accession number             |
|------------------------------------|---------------|--------------------------------|------------------------------|
| <i>Camelus bactrianus xinjiang</i> | 3             | BoLe, XinJiang, China          | FJ171705, FJ171708, FJ171713 |
| <i>Camelus bactrianus sunite</i>   | 3             | ShuNite, Inner Mongolia, China | FJ171699, FJ171706, FJ171711 |
| <i>Camelus bactrianus alashan</i>  | 3             | ALashan, Inner Mongolia, China | FJ171702, FJ171714, FJ171716 |
| <i>Camelus bactrianus red</i>      | 3             | DungGovi, Mongolia             | FJ171703, FJ171704, FJ171712 |
| <i>Camelus bactrianus brown</i>    | 3             | ÖmnöGovi, Mongolia             | FJ171700, FJ171707, FJ171710 |
| <i>Camelus bactrianus normal</i>   | 3             | Govi-Altay, Mongolia           | FJ171701, FJ171709, FJ171715 |
| <i>Camelus bactrianus ferus</i>    | 3             | Govi-Altay, Mongolia           | EF212038, EF507800, EF507801 |
