# Supplementary material for: Monophyletic origin of domestic bactrian camel (Camelus bactrianus) and its evolutionary relationship with the extant wild camel (Camelus bactrianus ferus)
Source: PubMed Central journal article supplement (PMC2721964; doi:10.1111/j.1365-2052.2008.01848.x), 2009-08
Supplement: age0040-0377-SD4.pdf [file age0040-0377-SD4.pdf]

**Table S2.** PCR primers used

| Primer | Sequence(5'-3')       | 5'Position | Strand |
|--------|-----------------------|------------|--------|
| lt1    | ATCCCAGCCTTTCTATTAG   | 78         | upper  |
| lt2    | CCTAGTTCAATCAAGCACTC  | 898        | lower  |
| lt3    | AAAACGTTAGGTCAAGGTG   | 740        | upper  |
| lt4    | CTCTCTAAGGAAGGTTGTATC | 1562       | lower  |
| lt5    | TGTCCAGGAAATGAATATAAG | 1456       | upper  |
| lt6    | AATTGCTAACTCAGGTAGAAG | 2240       | lower  |
| lt7    | TAAGACGAGAAGACCCTATG  | 2145       | upper  |
| lt8    | CGATGATGAACATAGTAACAG | 2962       | lower  |
| lt9    | CCTAGGCTACATGCAACTC   | 2823       | upper  |
| lt10   | ACACGTGTCATATGCATAAG  | 3658       | lower  |
| lt11   | AACCGCAACTTTCCTATG    | 3540       | upper  |
| lt12   | AGCCTCCAACTATAATTGAC  | 4406       | lower  |
| lt13   | TCTCCGTACTGTACCAAATC  | 4323       | upper  |
| lt14   | TTGAAGCCAGCTGACTAG    | 5161       | lower  |
| lt15   | GCTAAGCCCTTACTAGATTG  | 5081       | upper  |
| lt16   | AGAGAACGGCAGTGATTAG   | 5916       | lower  |
| lt17   | ATTTAGCGGGAGTATCTTC   | 5785       | upper  |
| lt18   | GTAGTCAGAGTAGCGTCGAG  | 6662       | lower  |
| lt19   | CACGATTGACGATACATGAG  | 6542       | upper  |
| lt20   | TGGTTTTAGGTCTGATGTTG  | 7411       | lower  |

|      |                        |       |       |
|------|------------------------|-------|-------|
| lt21 | AGCTACGAGTATACGGACTAC  | 7340  | upper |
| lt22 | AGTCCTAGGAGATTGGTAGTC  | 8197  | lower |
| lt23 | TAATCCGACTCACATCTAAAC  | 8083  | upper |
| lt24 | AGTGATAAAAGGCTCAGAAG   | 8927  | lower |
| lt25 | AGACGTTGTCCGAGAAAG     | 8811  | upper |
| lt26 | AGGTCAAATAGGAGGAATG    | 9671  | lower |
| lt27 | CCCAACTATACATTTATGCAG  | 9545  | upper |
| lt28 | GGCAGTAGTCATGTCGTTAG   | 10397 | lower |
| lt29 | CTCCACGCTTAATCAGTATAG  | 10313 | upper |
| lt30 | AACTATAAGGGTCGTAGCTC   | 11127 | lower |
| lt31 | CACTTATTGCATATTCCTCAG  | 11047 | upper |
| lt32 | TCTTGGTTCGAATGGATG     | 11932 | lower |
| lt33 | CAACACCTACAACAACAATC   | 11825 | upper |
| lt34 | CCAAGTGGCTTGAAGTAG     | 12684 | lower |
| lt35 | AACCTTAACCCTATGCTTG    | 12593 | upper |
| lt36 | CTCCAGTCAAAGTAGGTCTAG  | 13430 | lower |
| lt37 | CTTCTTTCCCACTATTATACAC | 13334 | upper |
| lt38 | AAGCAGATTCCTAGTAGAGAG  | 14281 | lower |
| lt39 | AACACCCGAAAATCACAC     | 14183 | upper |
| lt40 | TGCTAGGATTAGGATAGAGAG  | 15065 | lower |
| lt41 | CCTCAATACACCACCACAC    | 14960 | upper |
| lt42 | AGATGGTCCTGAAGTAAGAAC  | 15811 | lower |

|       |                       |       |       |
|-------|-----------------------|-------|-------|
| lt43  | TTAGATCACGAGCTTAATCAC | 15668 | upper |
| lt44  | TGTGGCTACTTGAGAGATTG  | 16547 | lower |
| lt45  | CGCATTCAAGCAAGTATTTAG | 16380 | upper |
| lt46  | ACCTTAGCTGTCGTGTAGTAG | 482   | lower |
| Cytb1 | GTACGTCATCATATATTCC   | 14074 | upper |
| Cytb2 | TAGGTGTACGGCTACTAG    | 15141 | lower |
| Cytb3 | TTATTCGATACCTACATGC   | 14392 | upper |
| Cytb4 | GATAAGTGCTAGGATTAGG   | 15053 | lower |
| Cytb5 | TGCCATTTATTATCACAGC   | 14713 | upper |
| Cytb6 | TCTTCCCTGAGTCTTAGG    | 15360 | lower |

---
