# Supplementary material for: Monophyletic origin of domestic bactrian camel (Camelus bactrianus) and its evolutionary relationship with the extant wild camel (Camelus bactrianus ferus)
Source: PubMed Central journal article supplement (PMC2721964; doi:10.1111/j.1365-2052.2008.01848.x), 2009-08
Supplement: age0040-0377-SD5.pdf [file age0040-0377-SD5.pdf]

**Table S3.** Distribution of *cytb* haplotypes among the 18 domestic and three wild camels

| <b>Haplogroups</b> | <b>Haplotypes</b> | <i>C.bactrianus xinjiang</i> | <i>C.bactrianus sunite</i> | <i>C.bactrianus alashan</i> | <i>C.bactrianus red</i> | <i>C.bactrianus brown</i> | <i>C.bactrianus normal</i> | <i>C.bactrianus ferus</i> |
|--------------------|-------------------|------------------------------|----------------------------|-----------------------------|-------------------------|---------------------------|----------------------------|---------------------------|
| Domestic(D)        | D1                | 2                            | 3                          | 1                           | 0                       | 1                         | 1                          | 0                         |
|                    | D2                | 0                            | 0                          | 0                           | 0                       | 1                         | 0                          | 0                         |
|                    | D3                | 0                            | 0                          | 0                           | 0                       | 0                         | 1                          | 0                         |
|                    | D4                | 0                            | 0                          | 0                           | 1                       | 0                         | 0                          | 0                         |
|                    | D5                | 0                            | 0                          | 0                           | 1                       | 0                         | 0                          | 0                         |
|                    | D6                | 1                            | 0                          | 0                           | 0                       | 0                         | 0                          | 0                         |
|                    | D7                | 0                            | 0                          | 0                           | 0                       | 1                         | 0                          | 0                         |
|                    | D8                | 0                            | 0                          | 0                           | 1                       | 0                         | 0                          | 0                         |
|                    | D9                | 0                            | 0                          | 1                           | 0                       | 0                         | 0                          | 0                         |
|                    | D10               | 0                            | 0                          | 0                           | 0                       | 0                         | 1                          | 0                         |
|                    | D11               | 0                            | 0                          | 1                           | 0                       | 0                         | 0                          | 0                         |
| Wild (W)           | W1                | 0                            | 0                          | 0                           | 0                       | 0                         | 0                          | 1                         |
|                    | W2                | 0                            | 0                          | 0                           | 0                       | 0                         | 0                          | 1                         |
|                    | W3                | 0                            | 0                          | 0                           | 0                       | 0                         | 0                          | 1                         |
