# Supplementary material for: Monophyletic origin of domestic bactrian camel (Camelus bactrianus) and its evolutionary relationship with the extant wild camel (Camelus bactrianus ferus)
Source: PubMed Central journal article supplement (PMC2721964; doi:10.1111/j.1365-2052.2008.01848.x), 2009-08
Supplement: age0040-0377-SD6.pdf [file age0040-0377-SD6.pdf]

**Table S4.** Organization of the *Camelus bactrianus* mitochondrial genome

| Gene                                   | Start | End  | Strand | Length |
|----------------------------------------|-------|------|--------|--------|
| <i>Phe tRNA</i>                        | 1     | 67   | +      | 67     |
| <i>s-rRNA</i>                          | 68    | 1035 | +      | 968    |
| <i>Val tRNA</i>                        | 1035  | 1100 | +      | 66     |
| <i>l-rRNA</i>                          | 1101  | 2665 | +      | 1565   |
| <i>Leu tRNA</i>                        | 2666  | 2740 | +      | 75     |
| <i>NADH dehydrogenase subunit 1</i>    | 2744  | 3699 | +      | 318    |
| <i>Ile tRNA</i>                        | 3700  | 3768 | +      | 69     |
| <i>Gln tRNA</i>                        | 3766  | 3838 | -      | 73     |
| <i>Met tRNA</i>                        | 3840  | 3908 | +      | 69     |
| <i>NADH dehydrogenase subunit 2</i>    | 3909  | 4950 | +      | 347    |
| <i>Trp tRNA</i>                        | 4951  | 5018 | +      | 68     |
| <i>Ala tRNA</i>                        | 5024  | 5092 | -      | 69     |
| <i>Asn tRNA</i>                        | 5094  | 5166 | -      | 73     |
| <i>Cys tRNA</i>                        | 5200  | 5266 | -      | 67     |
| <i>Tyr tRNA</i>                        | 5267  | 5333 | -      | 67     |
| <i>cytochrome c oxidase subunit I</i>  | 5335  | 6879 | +      | 514    |
| <i>Ser tRNA</i>                        | 6881  | 6951 | -      | 71     |
| <i>Asp tRNA</i>                        | 6955  | 7021 | +      | 67     |
| <i>cytochrome c oxidase subunit II</i> | 7023  | 7706 | +      | 227    |
| <i>Lys tRNA</i>                        | 7710  | 7776 | +      | 67     |

|                                         |       |       |   |     |
|-----------------------------------------|-------|-------|---|-----|
| <i>ATP synthase F0 subunit 8</i>        | 7778  | 7981  | + | 67  |
| <i>ATP synthase F0 subunit 6</i>        | 7939  | 8619  | + | 226 |
| <i>cytochrome c oxidase subunit III</i> | 8619  | 9402  | + | 261 |
| <i>Gly tRNA</i>                         | 9403  | 9472  | + | 70  |
| <i>NADH dehydrogenase subunit 3</i>     | 9470  | 9818  | + | 116 |
| <i>Arg tRNA</i>                         | 9820  | 9887  | + | 68  |
| <i>NADH dehydrogenase subunit 4L</i>    | 9888  | 10184 | + | 98  |
| <i>NADH dehydrogenase subunit 4</i>     | 10178 | 11555 | + | 459 |
| <i>His tRNA</i>                         | 11555 | 11624 | + | 70  |
| <i>Ser tRNA</i>                         | 11625 | 11683 | + | 59  |
| <i>Leu tRNA</i>                         | 11685 | 11754 | + | 70  |
| <i>NADH dehydrogenase subunit 5</i>     | 11755 | 13575 | + | 606 |
| <i>NADH dehydrogenase subunit 6</i>     | 13559 | 14086 | - | 175 |
| <i>Glu tRNA</i>                         | 14088 | 14156 | - | 69  |
| <i>cytochrome b</i>                     | 14161 | 15300 | + | 379 |
| <i>Thr tRNA</i>                         | 15301 | 15369 | + | 69  |
| <i>Pro tRNA</i>                         | 15369 | 15434 | - | 66  |

---
